# Supplementary material for: Structural determinants of miR156a precursor processing in temperature-responsive flowering in Arabidopsis
Source: J Exp Bot. 2016 Jun 21;67(15):4659–70. doi: 10.1093/jxb/erw248 (PMC4973740; doi:10.1093/jxb/erw248)
Supplement: Supplementary Data [file supp_erw248_supplementary_figures_S1_S10_table_S1.pdf]

## SUPPLEMENTARY DATA

### Table of contents

Supplementary Fig. S1. Standard curves used for absolute quantification of the four loci of pri-miR156 (a, b, c, and d) and PCR efficiency of qPCR primers used for absolute quantification

Supplementary Fig. S2. Schematic illustration of 5'-RLM-RACE strategy for mapping intermediates of miRNA processing.

Supplementary Fig. S3. Schematic illustration of structural variants of pri-miR156a and pri-miR172a.

Supplementary Fig. S4. Analysis of an independent line (#45-21-04) of *156-DBP-S2* plants.

Supplementary Fig. S5. Map of cleavage sites of structural variants in the pri-miR156a upper stem detected by 5'-RLM-RACE.

Supplementary Fig. S6. Flowering time phenotypes of plants overexpressing pri-miR156a upper stem variants at 23°C and at 16°C.

Supplementary Fig. S7. Leaf numbers at flowering and leaf number ratio of plants expressing structural variants of pri-miRNAs in the T<sub>1</sub> generation.

Supplementary Fig. S8. Student's *t*-test values between leaf numbers of mutant lines used in this study.

Supplementary Fig. S9. Analysis of *172-DBP-S7* plants.

Supplementary Fig. S10. Comparison of sequence and structure of different *MIR156* genes.

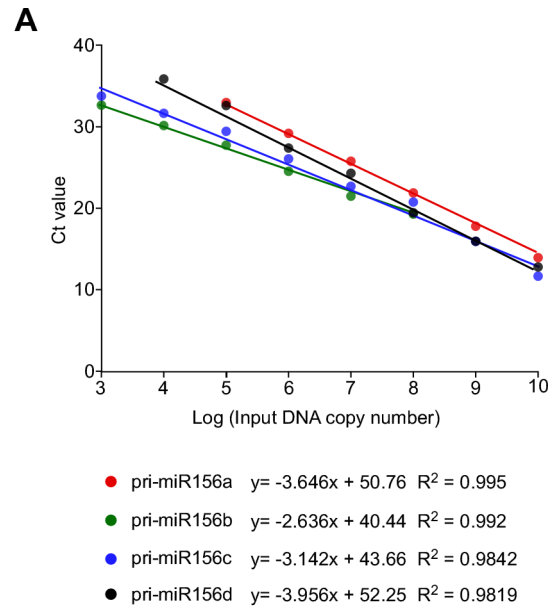

**B**

| miR156 loci              | pri-miR156a   | pri-miR156b   | pri-miR156c   | pri-miR156d   |
|--------------------------|---------------|---------------|---------------|---------------|
| Primer set used for qPCR | JH5241/JH5242 | JH5244/JH5245 | JH5248/JH5249 | JH5252/JH5253 |
| PCR efficiency           | 1.935         | 1.901         | 1.917         | 1.856         |

Supplementary Fig. S1. Standard curves used for absolute quantification of the four loci of pri-miR156 (a, b, c, and d) and PCR efficiency of qPCR primers used for absolute quantification.

(A) Standard curves showing the Ct values plotted versus the known concentration of serial dilutions of each pri-miR156 transcript (log scale). Note that all the standard curves overlap, indicating that our primers had similar PCR efficiency.

(B) The PCR efficiency values of primers sets used for amplification each pri-miR156 locus, calculated by using LinRegPCR (Ramakers *et al.*, 2003).

### Loop-to-base processing mode

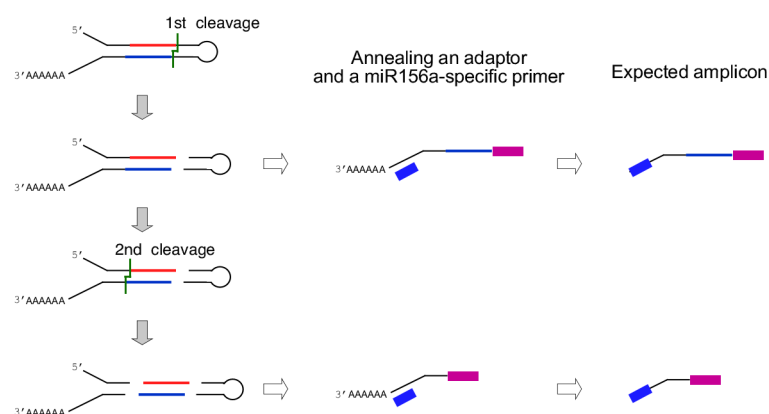

### Base-to-loop processing mode

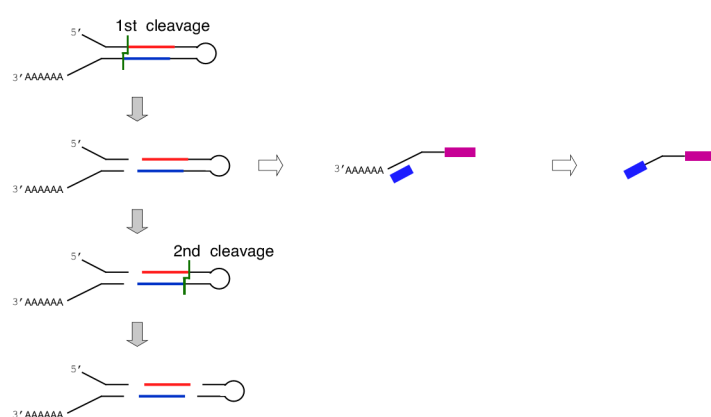

Supplementary Fig. S2. Scheme illustration of 5'-RLM-RACE strategy for mapping intermediates of miRNA processing. Note that the number of expected amplicons depends on the direction of miRNA precursor processing (loop-to-base: 2 ; base-to-loop: 1)

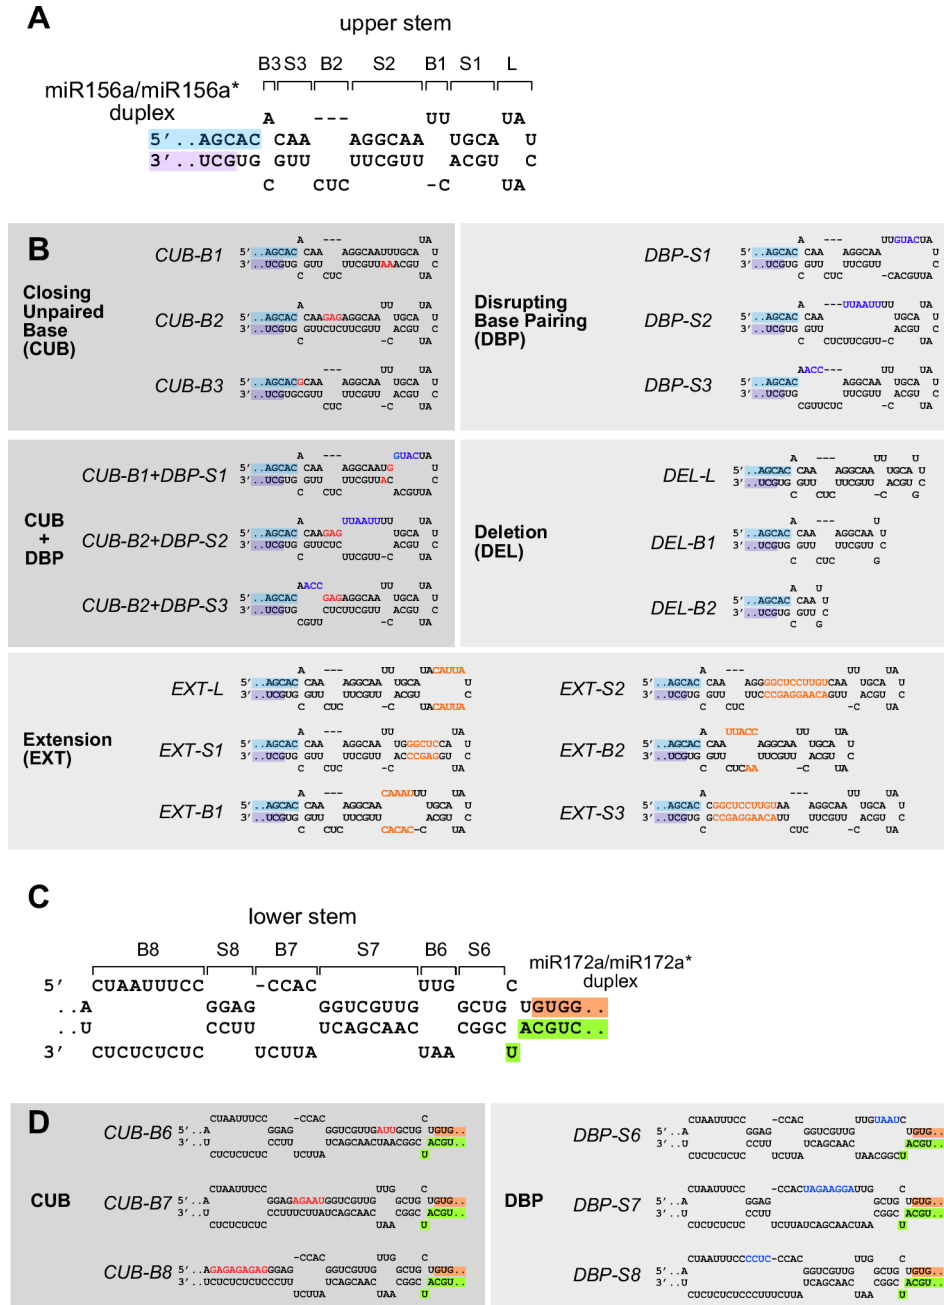

Supplementary Fig. S3. Schematic illustration of structural variants of pri-miR156a and pri-miR172a.

(A) Secondary structure of the pri-miR156a hairpin. The mature miR156a and miR156a\* sequences are highlighted in cyan and purple, respectively. B, L, and S denote bulge, loop, and stem, respectively.

(B) A diagram of structural variants in the pri-miR156a upper stem. Partial miR156a/miR156a\* sequences are shown. Mutated nucleotides are shown in different colors [closing unpaired bases (red), disrupting base-pairing (blue), and extension (orange)].

(C) Secondary structure of the pri-miR172a hairpin. Partial sequences of the miR172a/miR172a\* duplex are highlighted in light green and orange, respectively. B, L, and S denote bulge, loop, and stem, respectively.

(D) Diagram of structural variants in the pri-miR172a lower stem. Partial sequences of the miR172a/miR172a\* duplex are highlighted in light green and orange, respectively. Mutated nucleotides are shown in different colors [closing un-paired bases (red) and disrupting base-pairing (blue)].

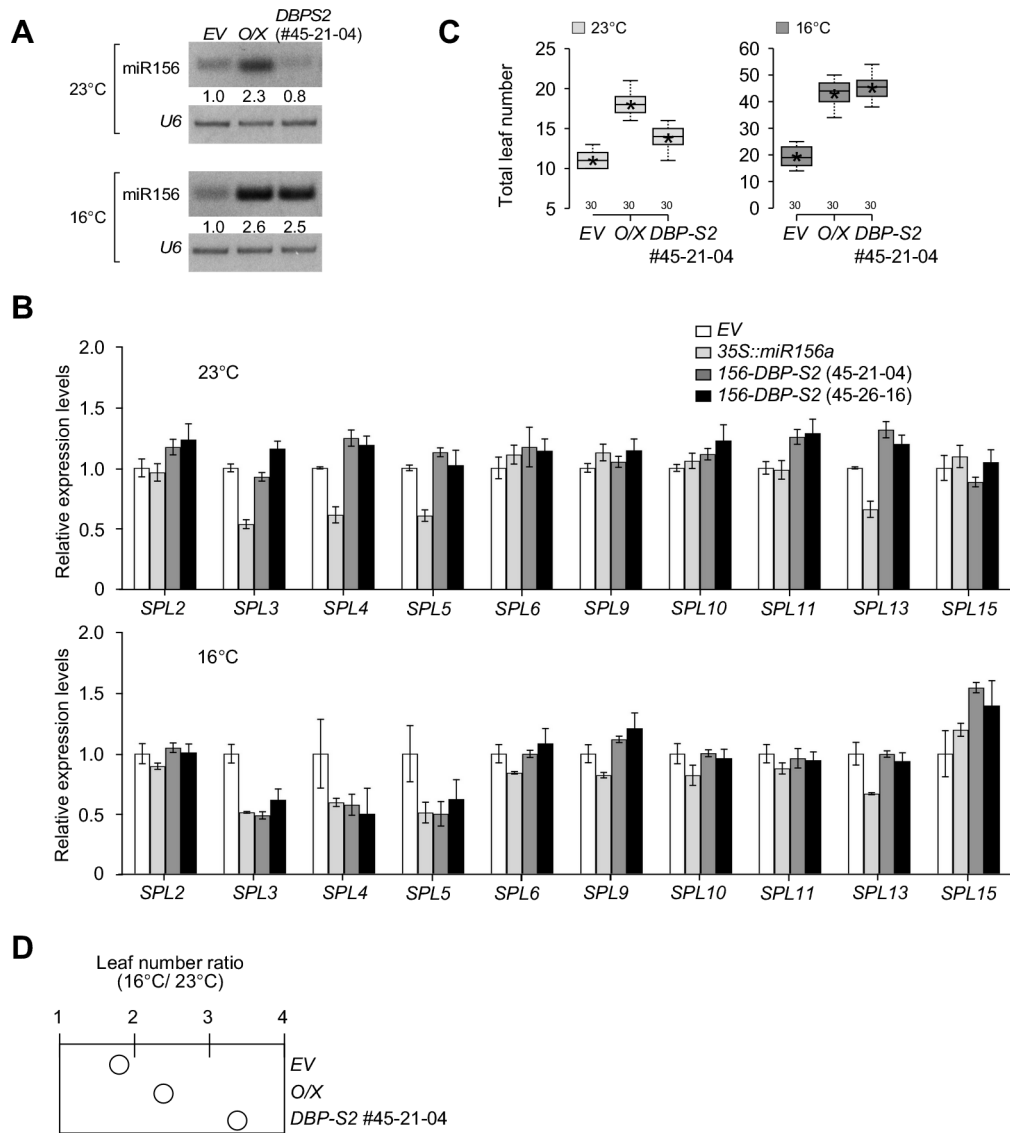

Supplementary Fig. S4. Analysis of an independent line (#45-21-04) of *156-DBP-S2* plants.

(A) Levels of mature miR156 in an independent homozygous line of *156-DBP-S2* (#45-21-04) plants at 23°C and 16°C. *U6* was used as a loading control. The numbers below each band indicate the fold change relative to the miR156 level in *EV* plants after normalization to *U6* at each temperature. (B) Expression levels of *SPL* genes in 9-day-old seedlings of #45-21-04 lines of *156-DBP-S2* plants at 23°C and 16°C, determined via qPCR. Note that the #45-26-16 line was the reference line used for *156-DBP-S2* plants in the main figures. Error bars indicate standard deviation. Each gene's expression levels in *EV* plants were set to one. (C) Leaf numbers of the #45-21-04 line of *156-DBP-S2* plants at 23°C and 16°C. Distribution of leaf numbers is shown as a box plot (see methods for further information for box

plots). O/X: plants overexpressing the un-mutated construct (*35S::miR156a*). (D)  
Leaf number ratio (16°C/23°C) of the #45-21-04 line of *156-DBP-S2* plants.



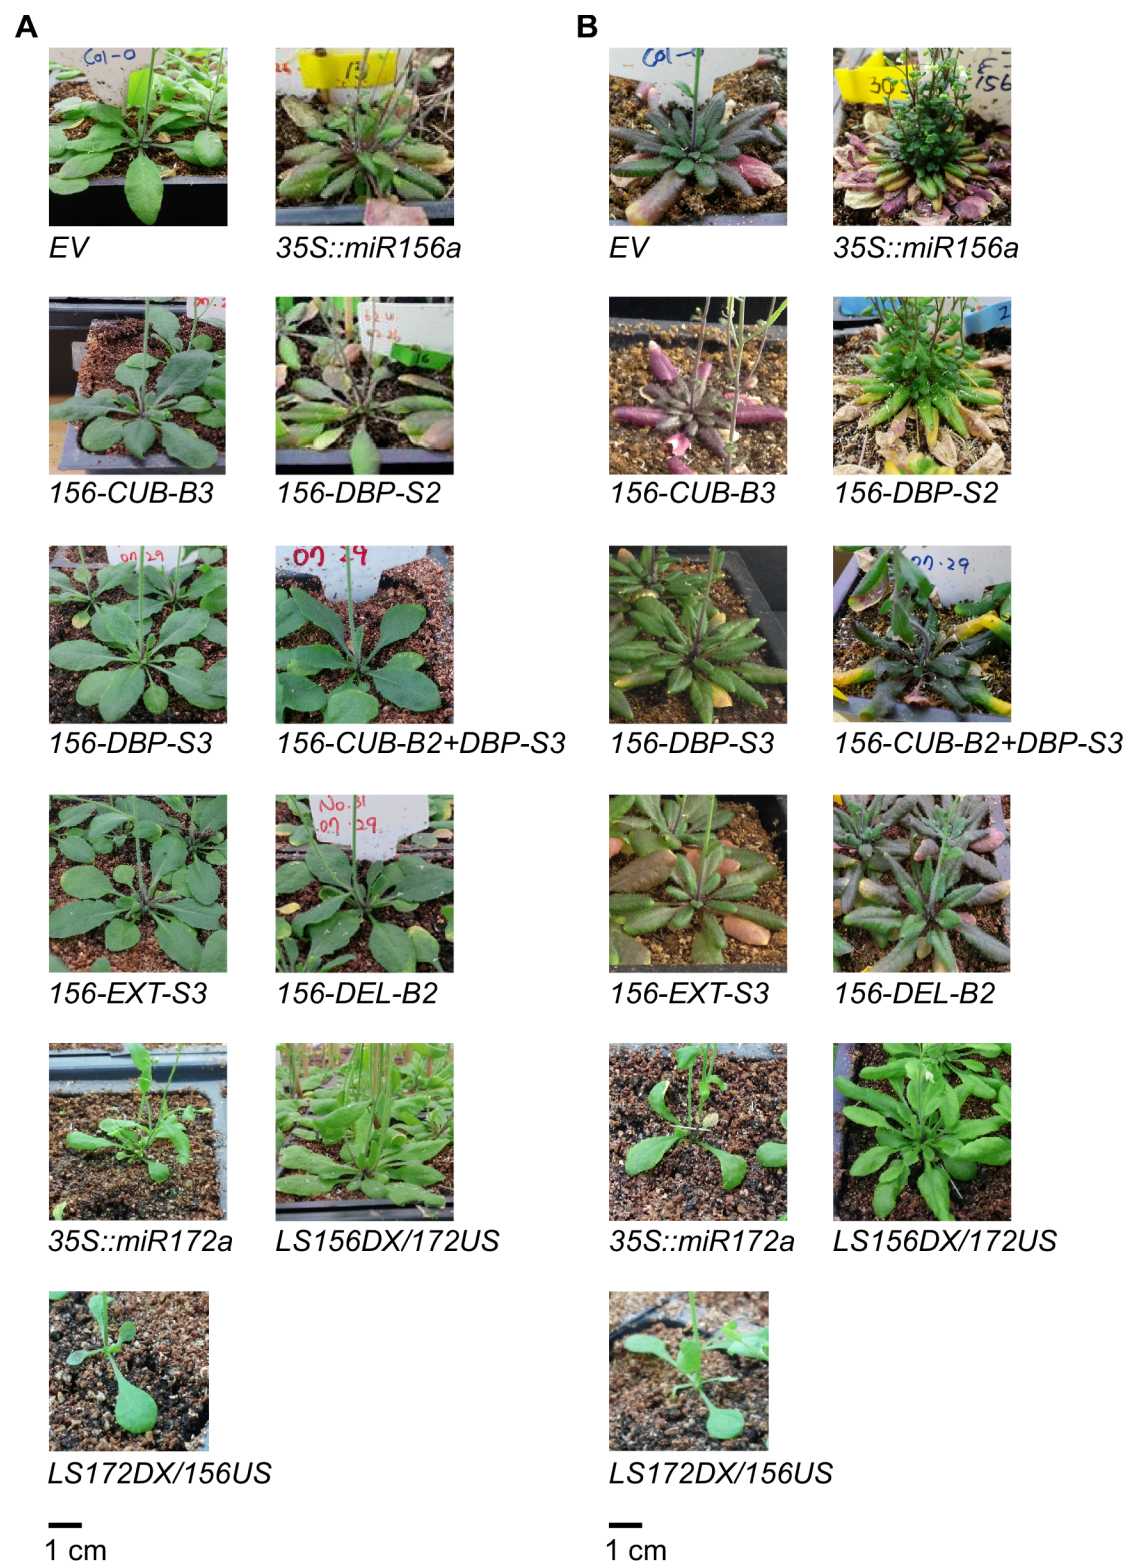

Supplementary Fig. S6. Flowering time phenotypes of pri-miR156a upper stem variants at 23°C (A) and at 16°C (B).

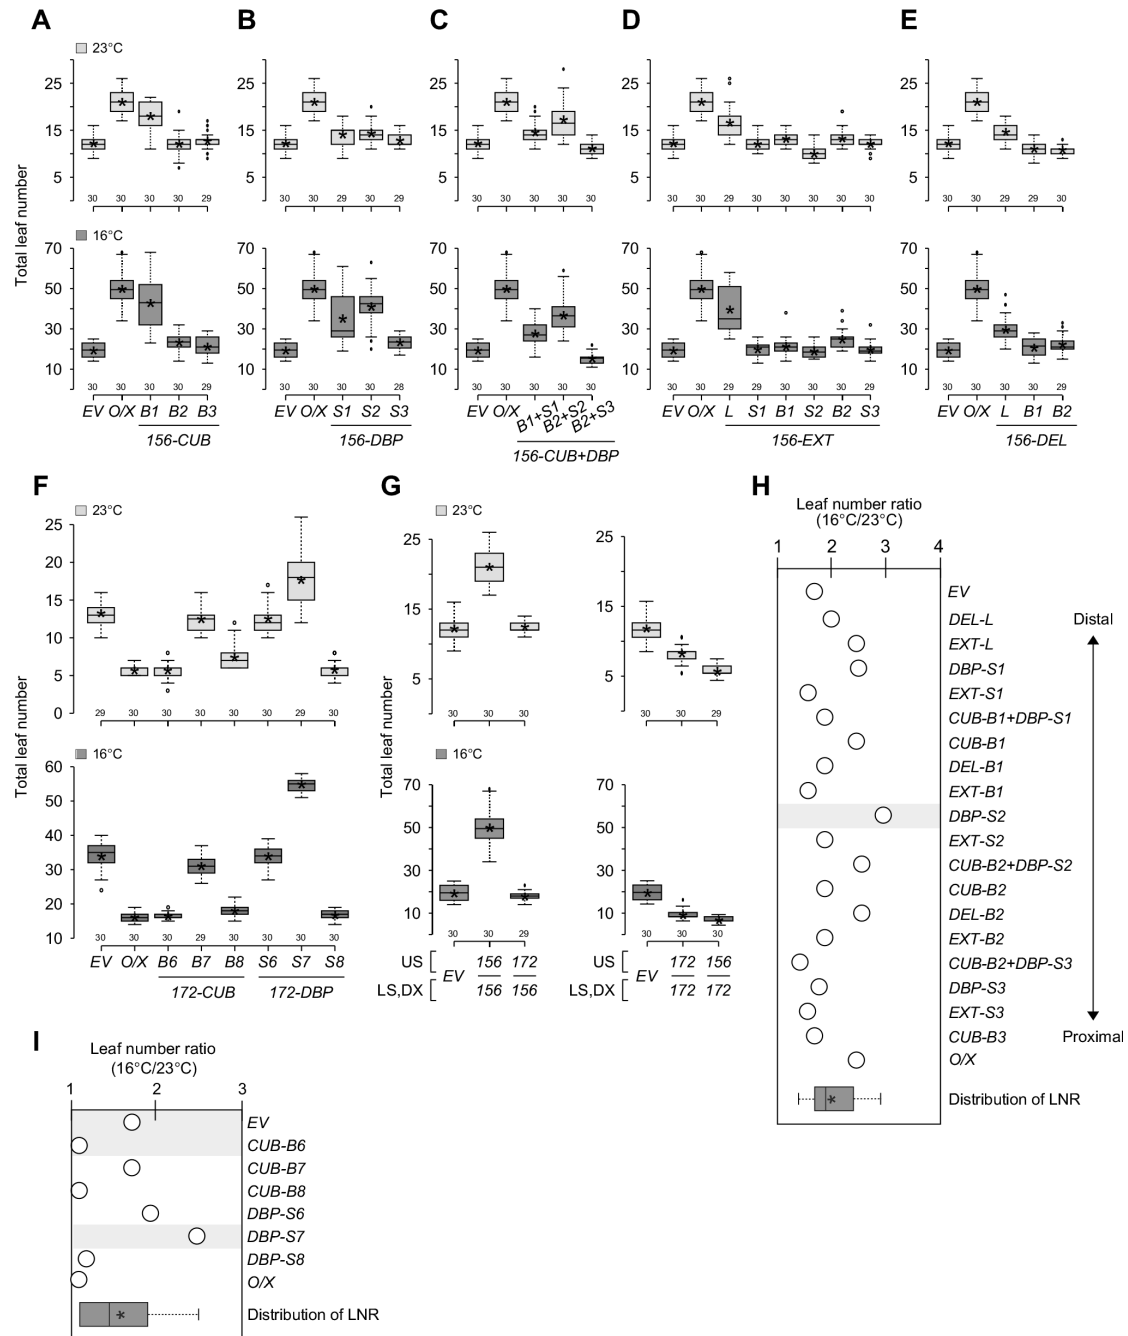

Supplementary Fig. S7. Flowering time of plants expressing structural variants of pri-miRNAs in the T<sub>1</sub> generation. (A-E) Leaf numbers of plants carrying structural variants in the pri-miR156a upper stem. O/X: plants overexpressing the un-mutated construct (35S::miR156a). (F) Leaf numbers of plants carrying structural variants in the pri-miR172a lower stem. O/X: plants overexpressing the un-mutated construct (35S::miR172a) (G) Leaf numbers of plants carrying stem-swapping variants of pri-miR156a and pri-miR172a at 23°C and 16°C. Distribution of leaf numbers is shown as a box plot (see methods for further information on box plots). (H) Leaf number

ratio (16°C/23°C) of plants overexpressing structural variants of pri-miR156a. (l) Leaf number ratio (16°C/23°C) of plants overexpressing structural variants of pri-miR172a. Distribution of LNR of the plants presented in this graph is shown as a box plot at the bottom of the graph.

|               | 23°C                  | 16°C                  |
|---------------|-----------------------|-----------------------|
| EV            | $1.0 \times 10^{-32}$ | $1.2 \times 10^{-27}$ |
| 35S::miR156a  | $6.3 \times 10^{-9}$  | 0.23                  |
| CUB-B1        | $1.8 \times 10^{-26}$ | $1.1 \times 10^{-31}$ |
| CUB-B2        | $2.4 \times 10^{-11}$ | $3.0 \times 10^{-13}$ |
| CUB-B3        |                       |                       |
| 35S::miR156a  | 0.4                   | $8.2 \times 10^{-5}$  |
| DBP-S1        | $4.5 \times 10^{-17}$ | $8.1 \times 10^{-5}$  |
| DBP-S2        | $1.6 \times 10^{-4}$  | $1.6 \times 10^{-12}$ |
| DBP-S3        |                       |                       |
| 35S::miR156a  | $7.7 \times 10^{-18}$ | $2.4 \times 10^{-22}$ |
| CUB-B1+DBP-S1 | 0.1                   | $1.7 \times 10^{-19}$ |
| CUB-B2+DBP-S2 | $2.9 \times 10^{-10}$ | $3.6 \times 10^{-24}$ |
| CUB-B2+DBP-S3 |                       |                       |
| 35S::miR156a  | $8.6 \times 10^{-6}$  | $9.3 \times 10^{-8}$  |
| EXT-L         | $6.9 \times 10^{-11}$ | $4.3 \times 10^{-9}$  |
| EXT-S1        | $5.8 \times 10^{-9}$  | 0.04                  |
| EXT-B1        | $6.4 \times 10^{-3}$  | $1.2 \times 10^{-3}$  |
| EXT-S2        | $1.6 \times 10^{-4}$  | $2.1 \times 10^{-6}$  |
| EXT-B2        | $2.6 \times 10^{-8}$  | 0.1                   |
| EXT-S3        |                       |                       |
| 35S::miR156a  | $3.9 \times 10^{-27}$ | $4.6 \times 10^{-22}$ |
| DEL-L         | $2.0 \times 10^{-4}$  | $4.8 \times 10^{-5}$  |
| DEL-B1        | 0.78                  | $1.3 \times 10^{-8}$  |
| DEL-B2        |                       |                       |

|               | 23°C                  | 16°C                  |
|---------------|-----------------------|-----------------------|
| EV            | $1.0 \times 10^{-32}$ | $1.2 \times 10^{-27}$ |
| 35S::miR156a  | $5.0 \times 10^{-33}$ | $1.1 \times 10^{-34}$ |
| LS156DX/172US |                       |                       |
| EV            | $4.6 \times 10^{-22}$ | $2.2 \times 10^{-20}$ |
| 35S::miR172a  | 0.07                  | 0.6                   |
| LS172DX/156US |                       |                       |

|              | 23°C                  | 16°C                  |
|--------------|-----------------------|-----------------------|
| EV           | $3.1 \times 10^{-27}$ | $5.0 \times 10^{-41}$ |
| 35S::miR172a | $1.4 \times 10^{-10}$ | $2.1 \times 10^{-9}$  |
| CUB-B6       | $2.6 \times 10^{-18}$ | $5.5 \times 10^{-21}$ |
| CUB-B7       | 0.03                  | $1.2 \times 10^{-3}$  |
| CUB-B8       |                       |                       |
| 35S::miR172a | $4.9 \times 10^{-10}$ | $7.4 \times 10^{-36}$ |
| DBP-S6       | $3.0 \times 10^{-40}$ | $5.4 \times 10^{-44}$ |
| DBP-S7       | $2.1 \times 10^{-21}$ | $1.1 \times 10^{-11}$ |
| DBP-S8       |                       |                       |

Supplementary Fig. S8. Student's *t*-test values between leaf numbers of mutant lines used in this study. Note that values smaller than 0.005 are shaded in grey.

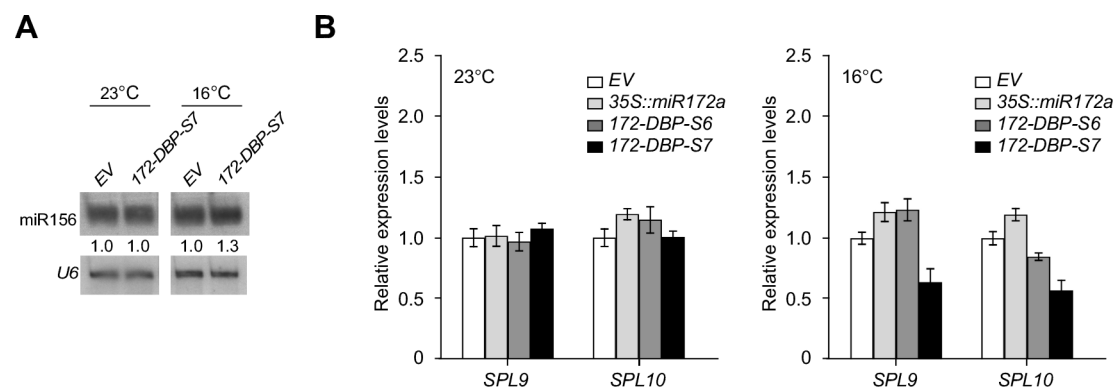

Supplementary Fig. S9. Analysis of *172-DBP-S7* plants.

(A) Levels of mature miR156 in *172-DBP-S7* plants at 23°C and 16°C. *U6* was used as a loading control. The numbers below each band indicate the fold change relative to the miR156 level in *EV* plants at 23°C after normalization to *U6* at each temperature. (B) Expression levels of *SPL9* and *SPL10* in *172-DBP-S6* and *172-DBP-S7* plants at 23°C and 16°C, determined via qPCR. Error bars indicate standard deviation. Expression levels of each gene in *EV* plants were set to one.

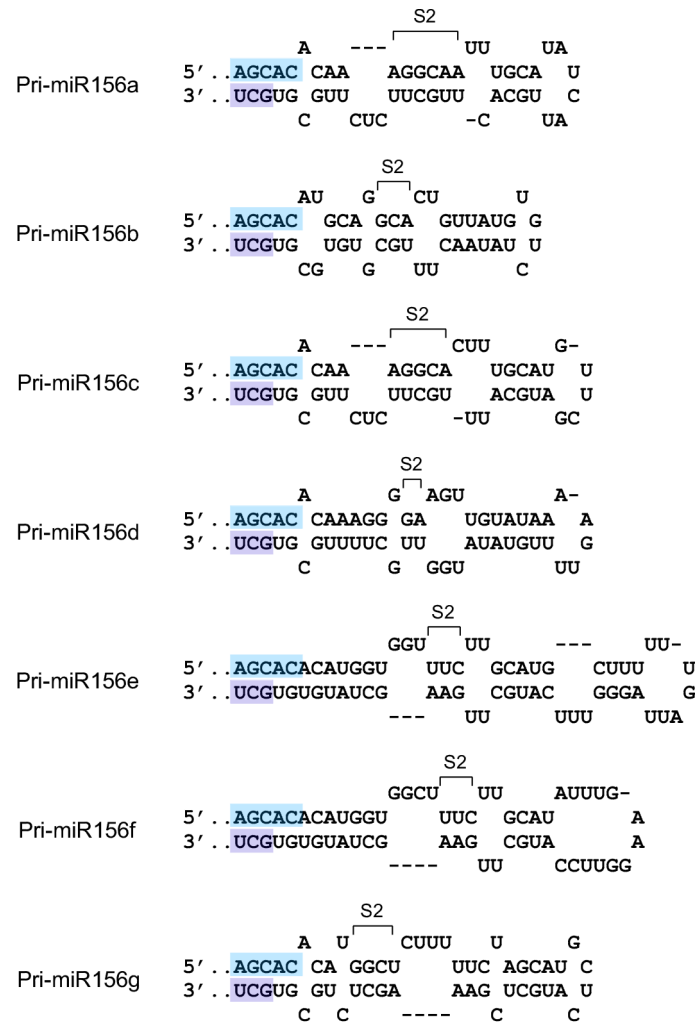

Supplementary Fig. S10. Comparison of sequences and structures of the upper stem region of different pri-miR156 genes.

Supplementary Table S1. Oligonucleotide sequences used in this study

| Gene        | Name   | Sequence (5' to 3')                | Purpose                                              | Direction          |
|-------------|--------|------------------------------------|------------------------------------------------------|--------------------|
| Pri-miR156a | JH7066 | GCTCTCACAATTTCCAAGGTGCTGC          | 5'-RACE for cleavage site mapping cleavage abundance | Anti-sense (outer) |
|             | JH7067 | AGGGCTCTTCCTTAAGGACAGTATTTGTG      | 5'-RACE for cleavage site mapping cleavage abundance | Anti-sense (inner) |
|             | JH6193 | cgattctagaGGGTCTCAAATGGAATCTCTTCTC | Absolute quantification (cloning pri-miR156a)        | Sense              |
|             | JH6194 | cgatggtaccGCCAGAGTTTAGATCGTATCTTC  | Absolute quantification (cloning pri-miR156a)        | Anti-sense         |
|             | JH5241 | GATCTCTGAAGTTGGACTAATT             | Absolute quantification (qPCR)                       |                    |
|             | JH5242 | AGACAGAGAAAGATTGTGTAAG             | Absolute quantification (qPCR)                       | Anti-sense         |
| Pri-miR156b | JH6195 | cgattctagaTCGACTGTTTCGCCATTAGA     | Absolute quantification (cloning pri-miR156b)        | Sense              |
|             | JH6196 | cgatggtaccGTAAGCAAGCACCCACTTCC     | Absolute quantification (cloning pri-miR156b)        | Anti-sense         |
|             | JH5244 | TCCATCTAGGTTTTTTTGAATTAGT          | Absolute quantification (qPCR)                       | Sense              |
|             | JH5245 | CGATCAAAGAAAGAAATGTCTAA            | Absolute quantification (qPCR)                       | Anti-sense         |
|             |        |                                    |                                                      |                    |
| Pri-miR156c | JH6197 | cgattctagaACTTTCCTCTTCTCCTTCGGTTA  | Absolute quantification (cloning pri-miR156c)        | Sense              |
|             | JH6198 | cgatggtaccAAATCAATGGCAGCAAATAAGAA  | Absolute quantification (cloning pri-miR156c)        | Anti-sense         |
|             | JH5248 | CAGAATTTGTGTCGGTAAGG               | Absolute quantification (qPCR)                       | Sense              |
|             | JH5249 | GATCGTATTTAATTTACCTTTGAG           | Absolute quantification (qPCR)                       | Anti-sense         |
|             |        |                                    |                                                      |                    |
| Pri-miR156d | JH7082 | ACCCTAACTTGCAGTGTCCGTA             | Absolute quantification (cloning pri-miR156d)        | Sense              |
|             | JH5253 | CATAACTAGAACAAATGGAATAAGG          | Absolute quantification (cloning pri-miR156d)        | Anti-sense         |

|              |         |                                   | Absolute quantification (qPCR) |            |
|--------------|---------|-----------------------------------|--------------------------------|------------|
|              | JH5252  | TTTAGTGTCTATACTAGATAAATATATG      | Absolute quantification (qPCR) | Sense      |
| <i>SPL2</i>  | JH6034Q | ACGGGTTGGAGGTTGCTTGAGG            | qPCR                           | Sense      |
|              | JH6035Q | TTTCCGATACCGAGCACAATAG            | qPCR                           | Anti-sense |
| <i>SPL3</i>  | JH6036Q | CTTAGCTGGACACAACGAGAGAAGGC        | qPCR                           | Sense      |
|              | JH6037Q | GAGAAACAGACAGAGACACAGAGGA         | qPCR                           | Anti-sense |
| <i>SPL4</i>  | JH6038Q | TCAAGGGTAGAGATGACACTTCCTATGC      | qPCR                           | Sense      |
|              | JH5652  | GGTTCAAGTATAGTCTTAGCGTTTGCAT      | qPCR                           | Anti-sense |
| <i>SPL5</i>  | JH6040Q | CCAGACTCAAGAAAGAAACAGGGTAGACAG    | qPCR                           | Sense      |
|              | JH6041Q | TCCGTGTAGGATTTAATACCATGACC        | qPCR                           | Anti-sense |
| <i>SPL6</i>  | JH6042Q | CCACCGTACAAGTAGACTCGTGAG          | qPCR                           | Sense      |
|              | JH6043Q | GAGATTTTGGTTGGGTTGGGTGA           | qPCR                           | Anti-sense |
| <i>SPL9</i>  | JH6130Q | TTTAGTCAAGGTTCAAGTTGGTGGA         | qPCR                           | Sense      |
|              | JH6131Q | CGCCATGTATTGTTGTTGTTGTT           | qPCR                           | Anti-sense |
| <i>SPL10</i> | JH6046Q | GTGTGGGAGAATGCTCAGGAGG            | qPCR                           | Sense      |
|              | JH6047Q | ACGGGAGTGTGTTTGATCCCTTGTTG        | qPCR                           | Anti-sense |
| <i>SPL11</i> | JH6048Q | AGTCCAAGTTTCAACTTCATGGCG          | qPCR                           | Sense      |
|              | JH6049Q | GAACAGAGTAGAGAAAATGGCTGCAC        | qPCR                           | Anti-sense |
| <i>SPL13</i> | JH6050Q | CCAATCTCTTCTTCTCCAAACAGTACCAGAAGC | qPCR                           | Sense      |
|              | JH6051Q | GAAGCAAATGAGGGACTGACGACG          | qPCR                           | Anti-sense |
| <i>SPL15</i> | JH6052Q | GAATGTTTTATCAGATGGAAGCTC          | qPCR                           | Sense      |
|              | JH6053Q | TCATCGAGTCGAAACCAGAAGATG          | qPCR                           | Anti-sense |
| <i>AP2</i>   | JH4587  | ACAACAAGATTCTCTCCACTCTAATGA       | qPCR                           | Sense      |
|              | JH4588  | GCAGCCAATTTTGATGAGGAGTA           | qPCR                           | Anti-sense |
| <i>SMZ</i>   | JH6225  | CATCATCATCGGAAAGTATAAAGTTGAC      | qPCR                           | Sense      |
|              | JH6226  | GTCTTCAGAGGTTTCATGGTTGCCATG       | qPCR                           | Anti-sense |
| <i>SNZ</i>   | JH6173  | CAGCAGCAGCAAAATGCAATGAG           | qPCR                           | Sense      |
|              | JH6174  | CACCGATCGATTCAAACCCATGT           | qPCR                           | Anti-sense |
| <i>TOE1</i>  | JH4583  | TTTACTGGAACGGAGCATGC              | qPCR                           | Sense      |
|              | JH4584  | GTGTGGATAAAAAGTAACCACGTGTT        | qPCR                           | Anti-sense |
| <i>TOE2</i>  | JH4589  | GGCATGTGATACGCCTTTCA              | qPCR                           | Sense      |
|              | JH4590  | ATAGAGACCGGGCTGATTCAGAT           | qPCR                           | Anti-sense |
| <i>TOE3</i>  | JH4591  | TATGATAAAGCGGCAATAAAGTGT          | qPCR                           | Sense      |
|              | JH4592  | AGGAATGCGGTAAGGGGAAG              | qPCR                           | Anti-sense |
| AT1G13320    | JH6505  | GCGGTTGTGGAGAACATGATACG           | qPCR (reference gene)          | Sense      |
|              | JH6506  | GAACCAAACACAATTCGTTGCTG           | qPCR (reference gene)          | Anti-sense |
| AT2G28390    | JH7588  | TTGATCCACTTGCAGACAAGGC            | qPCR (reference gene)          | Sense      |
|              | JH7589  | TACCCTTTGGCACACCTGATTG            | qPCR (reference gene)          | Anti-sense |

\*Lowercase letters denote synthetic restriction enzyme sites.

## References

**Ramakers C, Ruijter JM, Deprez RH, Moorman AF.** 2003. Assumption-free analysis of quantitative real-time polymerase chain reaction (PCR) data. *Neurosci Lett* **339**, 62-66.
